# Supplementary material for: Separation of Ambient Radio Noise and Radio Signals Received via Ionospheric Propagation
Source: MDPI journal article supplement (doi:10.3390/atmos14030529), 2023-03-09
Supplement: s1 [file s1]

Archive with 1 entries (1 files):
- atmosphere-2201741-supplementary.pdf
